# Supplementary material for: Identification and characterisation of the CD40-ligand of Sigmodon hispidus
Source: PLOS journal article supplement (doi:10.1371/journal.pone.0199067), 2018-07-27
Supplement: S3 (10.1371/journal.pone.0199067.s003) [file journal.pone.0199067.s003]

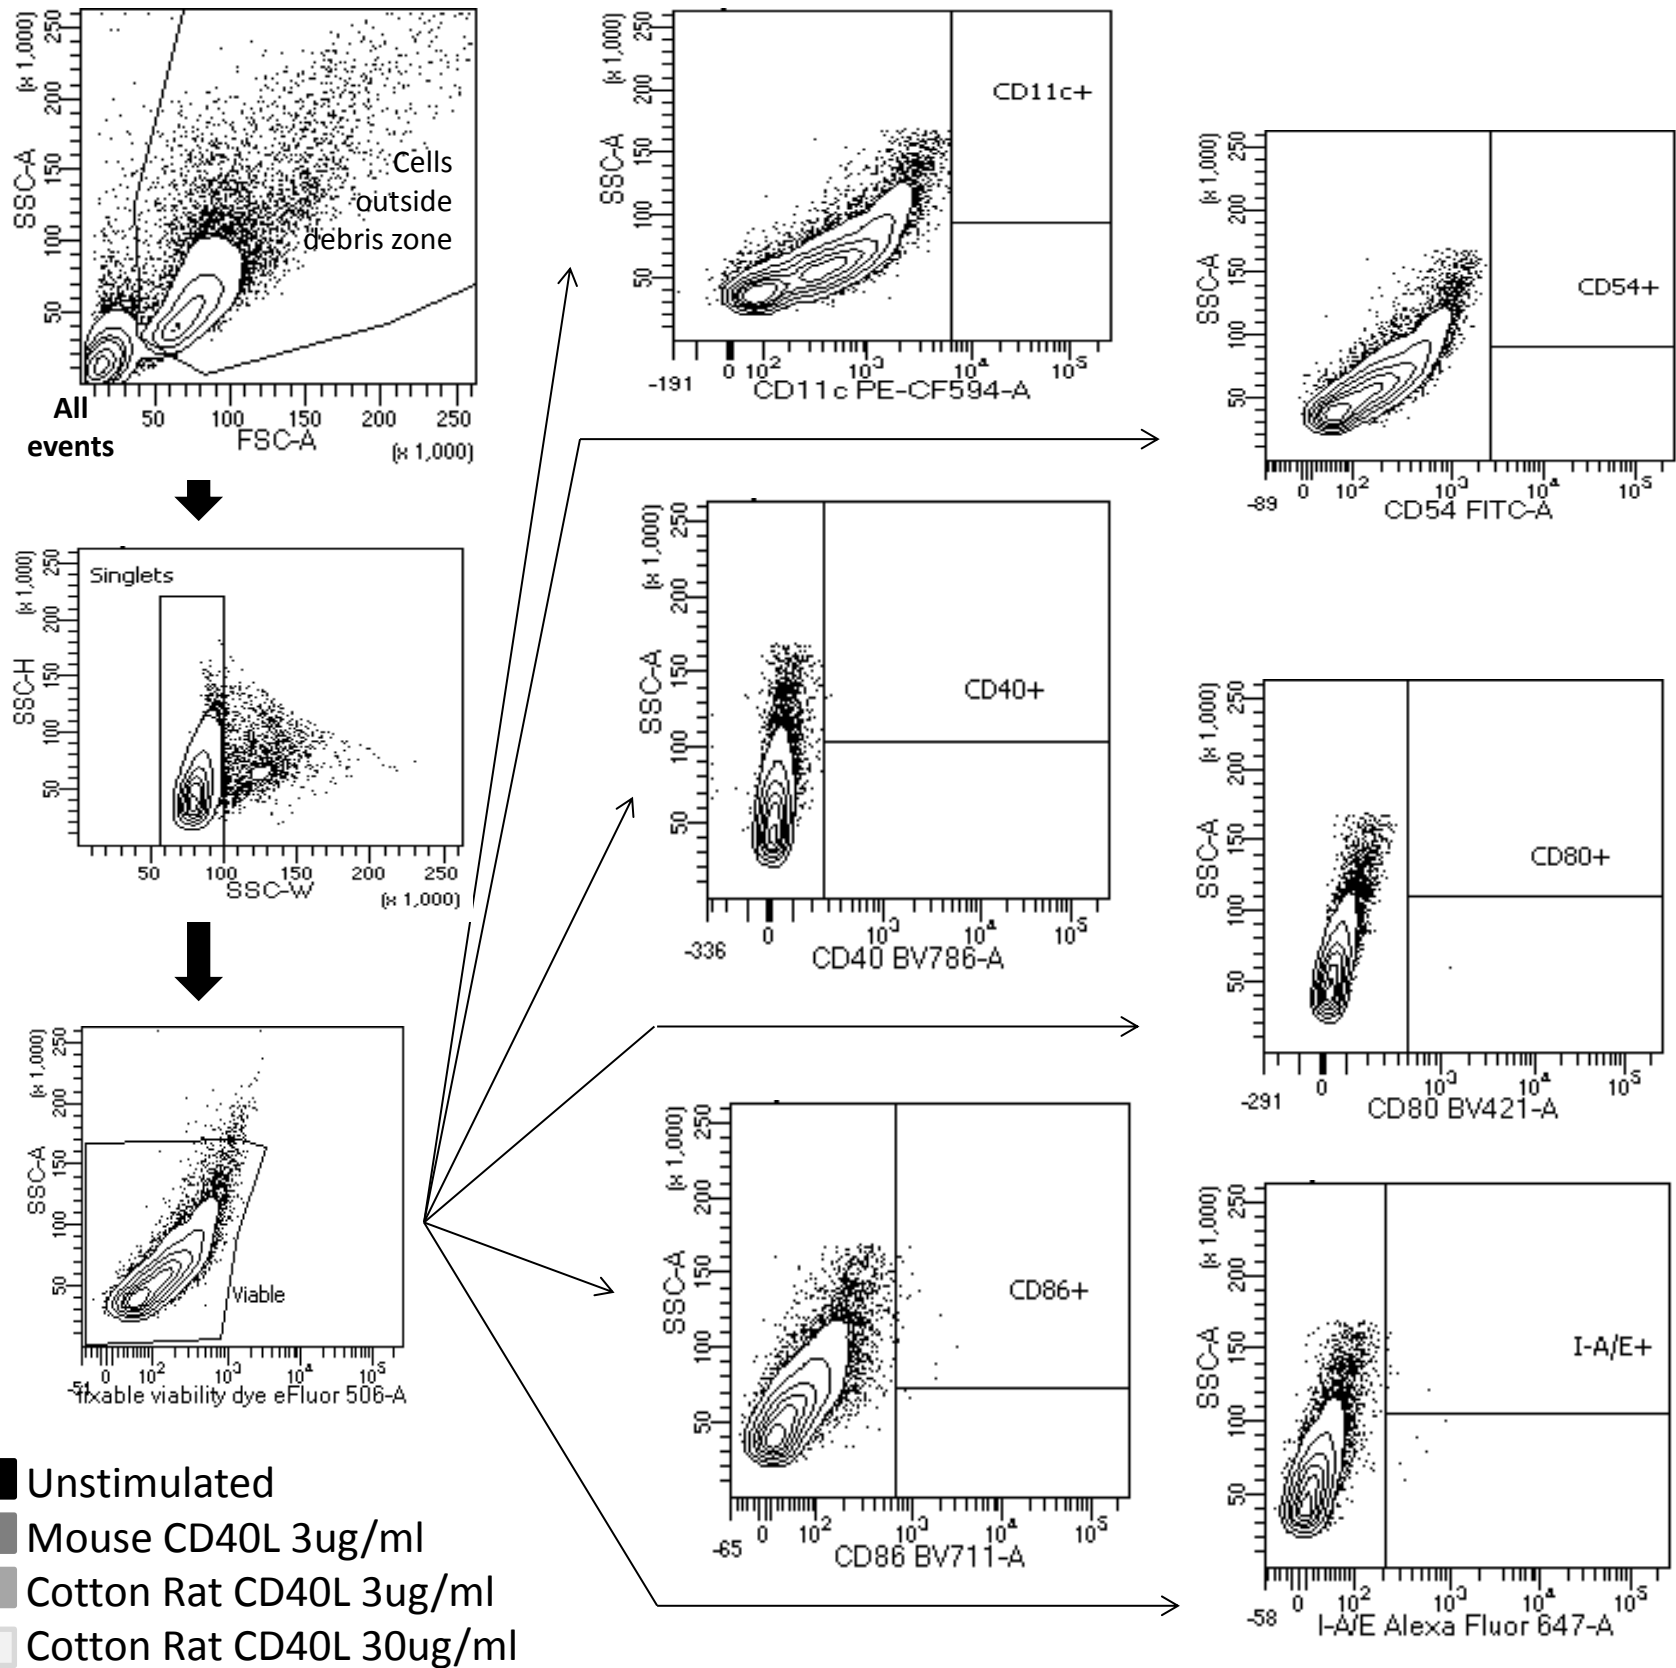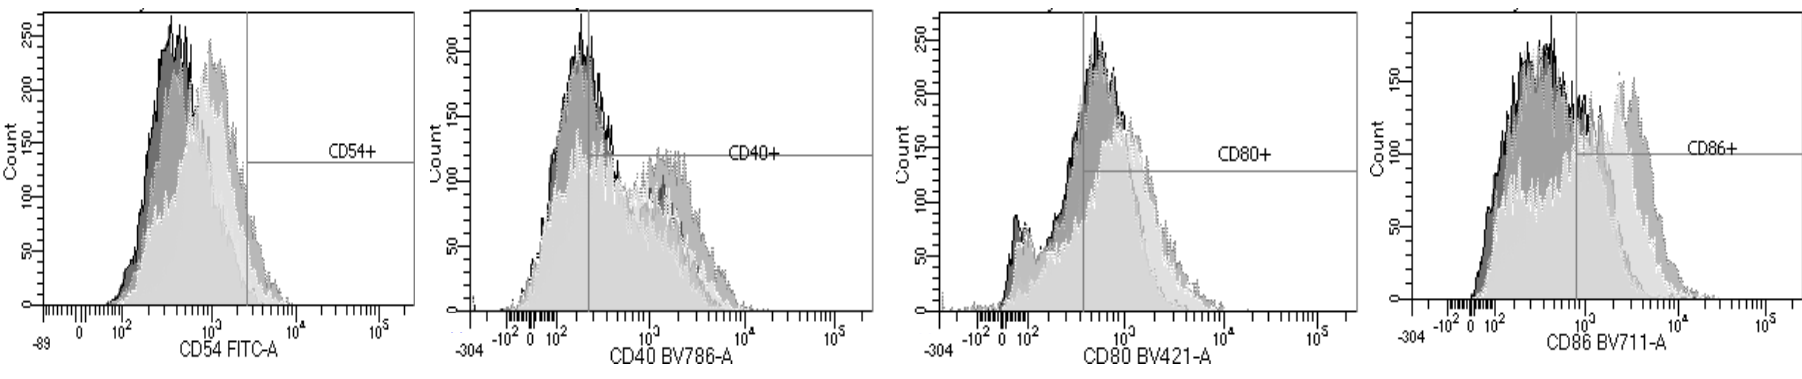

**S3\_Figure: Gating strategy for flow cytometry analysis of dendritic cells.**
